# Supplementary material for: Dried Fruit Intake and Cancer: A Systematic Review of Observational Studies
Source: PubMed Central journal article supplement — Adv Nutr. 2019 Aug 26;11(2):237–50. doi: 10.1093/advances/nmz085 (PMC7442373; doi:10.1093/advances/nmz085), 2019-08-26
Supplement: nmz085_supplemental_tables.pdf [file nmz085_supplemental_tables.pdf]

Supplementary data

**SUPPLEMENTAL TABLE 1** The Newcastle-Ottawa Quality Assessment scoring for cohort studies evaluating the relationships between dried fruit consumption and cancer risk

| Author, year (Ref)    | Representativeness | Selection of non-exposed cohort | Interview or validated FFQ | Outcome not present at start | Comparability of cohorts | Assessment of outcome | Follow-up is long enough for outcome to occur | Adequacy of follow-up | Total score |
|-----------------------|--------------------|---------------------------------|----------------------------|------------------------------|--------------------------|-----------------------|-----------------------------------------------|-----------------------|-------------|
| Botterweck, 1998 (49) | *                  | *                               | *                          |                              | **                       | *                     | *                                             | *                     | 8           |
| Colditz, 1985 (42)    | *                  | *                               | *                          | *                            | *                        | *                     | *                                             | *                     | 8           |
| Farvid, 2019 (50)     |                    | *                               | *                          | *                            | **                       | *                     | *                                             | *                     | 8           |
| Fraser, 1991 (45)     |                    | *                               | *                          |                              | **                       | *                     | *                                             | *                     | 7           |
| Mills, 1988 (43)      |                    | *                               | *                          | *                            | **                       | *                     | *                                             | *                     | 8           |
| Mills, 1989 (44)      |                    | *                               | *                          |                              | **                       | *                     | *                                             | *                     | 7           |
| Schuurman, 1998 (47)  | *                  | *                               | *                          |                              | **                       | *                     | *                                             | *                     | 8           |
| Tantamango, 2011 (46) |                    | *                               | *                          | *                            | **                       |                       | *                                             | *                     | 7           |
| Zeegers, 2001 (48)    | *                  | *                               | *                          |                              | **                       | *                     | *                                             | *                     | 8           |

Supplementary data

**SUPPLEMENTAL TABLE 2** The Newcastle-Ottawa Quality Assessment scoring for case-control studies evaluating the relationships between dried fruit consumption and cancer risk

| Author, year (Ref)        | Case validation | Representativeness | Selection of controls | Definition of controls | Comparability of cases and controls | Ascertainment of exposure | Uniform ascertainment for cases and controls | Non-response rate | Total score |
|---------------------------|-----------------|--------------------|-----------------------|------------------------|-------------------------------------|---------------------------|----------------------------------------------|-------------------|-------------|
| Alvarez-Cubero, 2016 (54) | *               | *                  | *                     |                        |                                     |                           | *                                            |                   | 4           |
| Baghurst, 1991 (56)       | *               | *                  | *                     |                        |                                     |                           |                                              | *                 | 4           |
| Gonzalez, 1991 (53)       | *               | *                  |                       | *                      | **                                  | *                         | *                                            |                   | 7           |
| Kellen, 2006 (51)         | *               | *                  | *                     |                        | **                                  | *                         | *                                            |                   | 7           |
| Laouamri, 2001 (57)       |                 | *                  | *                     |                        |                                     |                           | *                                            |                   | 3           |
| Tayyem, 2014 (55)         | *               | *                  |                       | *                      | **                                  |                           | *                                            |                   | 6           |
| Yassibas, 2012 (52)       | *               | *                  |                       | *                      | **                                  |                           | *                                            |                   | 6           |
